# Supplementary material for: Zoonotic potential of a novel bat morbillivirus
Source: Res Sq. 2021 Sep 29:rs.3.rs-926789. Preprint. [Version 1] doi: 10.21203/rs.3.rs-926789/v1 (PMC8491849; doi:10.21203/rs.3.rs-926789/v1)
Supplement: Supplement 2 [file 0bc90024a5dd4ec09b5fe0c4.xlsx]

## Sheet: Sheet1
Family	Subfamily	Genus	Species	Virus name (s)	Virus name abbreviation	Virus REFSEQ accession
Paramyxoviridae	Orthoparamyxovirinae	Morbillivirus	Canine morbillivirus	canine distemper virus	CDV	NC_001921
			Cetacean morbillivirus	cetacean morbillivirus	CeMV	NC_005283
			Feline morbillivirus	feline morbillivirus	FeMV	NC_039196
			Measles morbillivirus	measles virus	MeV	NC_001498
			Phocine morbillivirus	phocine distemper virus	PDV	NC_028249
			Rinderpest morbillivirus	rinderpest virus	RPV	NC_006296
			Small ruminant morbillivirus	peste-des-petits-ruminants virus	PPRV	NC_006383
		Morbillivirus	Myotis morbillivirus	Myotis bat morbillivirus	MBaMV	MW557651
		Henipavirus	Cedar henipavirus	Cedar virus	CedV	NC_025351
			Ghanaian bat henipavirus	Ghana virus	GhV	NC_025256
			Hendra henipavirus	Hendra virus	HeV	NC_001906
			Mojiang henipavirus	Mòjiāng virus	MojV	NC_025352
			Nipah henipavirus	Nipah virus	NiV	NC_002728
		Respirovirus	Bovine respirovirus 3	bovine parainfluenza virus 3	BPIV-3	NC_002161
			Human respirovirus 1	human parainfluenza virus 1	HPIV-1	NC_003461
			Human respirovirus 3	human parainfluenza virus 3	HPIV-3	NC_001796
			Murine respirovirus	Sendai virus	SeV	NC_001552
			Porcine respirovirus 1	porcine parainfluenza virus 1	PPIV-1	NC_025402
		Jeilongvirus	Beilong jeilongvirus	Beilong virus	BeiV	NC_007803
			Tailam jeilongvirus	Tailam virus	TaiV	NC_025355
			Jun jeilongvirus	J virus	JV	NC_007454
		Narmovirus	Nariva narmovirus	Nariva virus	NarV	NC_017937
			Mossman narmovirus	Mossman virus	MossV	NC_005339
		Salemvirus	Salem salemvirus	Salem virus	SalV	NC_025386
		Ferlavirus	Reptilian ferlavirus	Fer-de-Lance virus	FDLV	NC_005084
		Aquaparamyxovirus	Salmon aquaparamyxovirus	Atlantic salmom paramyxovirus	AsaPV	NC_025360
	Avulavirinae	Orthoavulavirus	Avian orthoavulavirus 1	avian paramyxovirus 1	APMV-1*	NC_039223
			Avian orthoavulavirus 9	avian paramyxovirus 9	APMV-9	NC_025390
		Paraavulavirus	Avian paraavulavirus 3	avian paramyxovirus 3	APMV-3	NC_025373
		Metaavulavirus	Avian metaavulavirus 2	avian paramyxovirus 2	APMV-2	NC_039230
			Avian metaavulavirus 5	avian paramyxovirus 5	APMV-5	NC_025361
	Rubulavirinae	Orthorubulavirus	Mumps orthorubulavirus	mumps virus	MuV	NC_002200
			Human orthorubulavirus 2	human parainfluenza virus 2	HPIV-2	NC_003443
			Porcine orthorubulavirus	La Piedad Michoacán Mexico virus	LPMV	NC_009640
		Pararubulavirus	Menangle pararubulavirus	Menangle virus	MenV	NC_039197
			Sosuga pararubulavirus	Sosuga virus	SOSV	NC_025343
			Tuhoko pararubulavirus 1	Tuhoko virus 1	ThkPV-1	NC_025410
	*Newcastle disease virus (NDV) is the prototypic APMV-1
